# Supplementary material for: Point process analysis of noise in early invertebrate vision
Source: PubMed Central journal article supplement (PMC5678801; doi:10.1371/journal.pcbi.1005687), 2017-10-27
Supplement: pcbi.1005687.s002.pdf [file pcbi.1005687.s002.pdf]

# Point Process Analysis of Noise in Early Invertebrate Vision

Kris V Parag\*, Glenn Vinnicombe,

Control Group, Department of Engineering, University of Cambridge, UK

E-mail: kvp23@cam.ac.uk (KVP)

## Supplementary Information S2

### Multi-state Bimodal Light Models Simulate a Main Light Switch with Gradual Transitions between Non-modal States

As mentioned in the main text, the light models developed here attempt to mimic as many of the properties of non-repeated naturalistic stimuli as possible, while still maintaining analytical tractability. The main paper focussed on a 2 state switching model with uniform state distribution, called the interrupted model. Here this interrupted model is extended to a richer multi-state space of  $m$  states, with bimodal Gaussian-like state distributions. These are described by nearest neighbour transitions between all states and a multi-state jump between each modal state of the chain (see **S1 Fig** for an 8 state model). This model represents a complex light source which flickers between two extreme intensities while also possessing small light changes about the extreme modes. The  $R$  matrix, which defines the transition rates between states in the model, is obtained by solving for an under-constrained system of equations described by  $\pi R = 0$ . Here  $\pi$  is a  $1 \times m$  vector describing the desired bimodal state distribution.

Let the  $m \times m$  generator,  $R$  have  $(i^{\text{th}}, j^{\text{th}})$  element denoted by  $R_{i,j}$ . Then for the bimodal model,  $R$  has diagonals  $R_{i,i} = -\Sigma_i$ , birth reactions  $R_{i,i+1} = a_i$ , death reactions  $R_{i+1,i} = b_{i+1}$  and modal switch entries  $R_{j,l} = \epsilon_{jl}$  and  $R_{l,j} = \epsilon_{lj}$ . Here  $i$  spans the Markov state space,  $j, l$  are the modal states and  $\Sigma_i$  is such that each row sum is 0. Setting linear death reactions,  $b_{i+1} = ki$  with  $k > 0$  and allowing  $\epsilon_{jl} = \epsilon_{lj} = \epsilon$  admits the solution for the births as:  $a_i = b_{i+1} \frac{\pi_{i+1}}{\pi_i}$  where  $\pi_i$  is the  $i^{\text{th}}$  component of  $\pi$ . The rate matrix, which describes the relation (linear in this case) between the states and the intensity, is then  $\Lambda = \alpha \text{diag}([0 \ 1 \ 2 \ \dots \ m])$  for the  $m$  state Markov chain. Note that the  $k$  here is the same as that used to define the dimensionless parameters  $\gamma$  and  $\beta$ . While  $\pi$  was chosen in this work to satisfy a bimodal Gaussian description, a rich set of light intensity dynamics are achievable with this model by choosing different stationary distributions and tuning the rates of  $R$ .

The power spectral density of the intensity for a bimodal light model at  $[m, \gamma, \epsilon] = [16, 10, 3k]$  is given in **S3 Fig**. This demonstrates that the mix of rates and amplitudes from the bimodal Gaussian Markov intensity results in  $\frac{1}{f}$  like behaviour over a large intermediate frequency ( $f$ ) range. This is an example of the more complex behaviour achievable with these models over the 2 state interrupted one. Designing different  $R$  matrices can generally encode various types of intensity frequency behaviour. This 16 state model and a similar one at  $\gamma = 20$  are examined further in Supplementary Information S3.

While a simple analytical solution to the Snyder filter equations for this model is not available, they can be transformed into a linear equation set in un-normalised probabilities that must then be normalised [4]. These are given below with  $q_j(t)$  as the  $j^{\text{th}}$  component of the normalised posterior vector,  $q(t)$  and  $r(t)$  is the vector of non-normalised probabilities. Note that  $q(0^+)$  indicates an initial condition of an assumed photon at  $t = 0$ . This is adjusted so that each new photon time serves as a new initial condition. As is standard in Snyder descriptions, the inter-event trajectory resets on every event. The reset or update equation remains as in expression (2) of Supplement S1.

$$r(t) = q(0^+)e^{(R-\Lambda)t} \quad (1)$$

$$q_j(t) = \frac{r_j(t)}{\sum_i r_i(t)} \quad (2)$$

The conditional mean estimate follows as  $\hat{x}_{\text{ph}}(t) = \sum_{i=1}^m iq_i(t)$ . If expression 1 is diagonalised it can be shown that, for any Markov model, the inter-event solutions of  $\hat{x}_{\text{ph}}(t)$  involve exponential type decaying

functions. Thus the qualitative nature of the bimodal Snyder solution is the same as the interrupted one, and is shown in **S2 Fig** for the visually simpler 8 state model from **S1 Fig** with  $\epsilon = k$ . There is always a stable decay, since for a well posed problem,  $(R - \Lambda)$  will never have positive eigenvalues. Note that the causal state estimate only involves operations on weighted sums and decaying functions. This is why the filter can be easily described with a neuronal network, as was mentioned in the ‘Biological Realisability’ section of main text. In summary, the Markov modulated Poisson light descriptions given here allow the encoding of a range of qualitatively different light intensity dynamics without changing the qualitative filtering solution form.

## References

1. Snyder D (1975) Random Point Processes. John Wiley and Sons Inc.
2. Kalman R (1960) A New Approach to Linear Filtering and Prediction Problems. *Journal of Basic Engineering* 82: 35-45.
3. Snyder D, Miller M (1991) Random Point Processes in Time and Space. Springer-Verlag.
4. Rudemo M (1972) Doubly-Stochastic Poisson Processes and Process Control. *Advances in Applied Probability* 2: 318-338.
5. Nikolic K, Loizu J, Degenaar P, Toumazou C (2010) A Stochastic Model of the Single Photon Response in *Drosophila* Photoreceptors. *Integrative Biology* 2: 354-370.
6. Nikolic K, Loizu J (2013) *Drosophila* Photo-transduction Simulator. *Journal of Open Research Software* 1.
7. Hardie R (2012) Phototransduction Mechanisms in *Drosophila* Microvillar Photoreceptors. *WIREs Membr Transp Signal* 1: 162-187.
8. Henderson S, Reuss H, R H (2000) Single Photon Responses in *Drosophila* Photoreceptors and their Regulation by  $\text{Ca}^{2+}$ . *Journal of Physiology* 524: 179-194.
